# Supplementary material for: Triblock copolymer assisted synthesis of periodic mesoporous organosilicas (PMOs) with large pores
Source: Royal Society of Chemistry journal article supplement (doi:10.1039/b106636f), 2001-01-01
Supplement: b106636f.doc [file b106636f.doc]

**Fig. 1** TG/DTA/MS data* of an as synthesized (upper left), a room temperature extracted (upper right) and a Soxhlet extracted (left) product synthesized with P123 and 1,2-bis(trimethoxysilyl)ethane.

* TG/DTA/MS data were recorded on a Netzsch STA 409C/MS thermobalance equipped with a quadrupol mass spectrometer QMS 421 from Balzer coupled via a capillary coupling system 403/4 from Netzsch; heating rate = 5K/min, dynamic air atmosphere with a continuous gas flow of 20ccm/min.

Each sample shows a drying step in the beginning of the heating process during which adsorbed water or ethanol is leaving the material. In any case this is completed before 175°C. Afterwards oxidation of the block copolymer and the bridging organic groups takes place. Mass losses are as follows (given in %wt with respect to :

|  | **as synthesized** | **extr. RT/EtOH/10h** | **extr. Soxhlet/EtOH/17h** |
| --- | --- | --- | --- |
| **drying** | 3.8% | 9.5% | 15.5% |
| **oxidation** | 37.7% | 19.5% | 14.5% |

In order to interprete the mass losses detected during the oxidation step exactly these have to be corrected for the completely dried material resulting in following values:

|  | **as synthesized** | **extr. RT/EtOH/10h** | **extr. Soxhlet/EtOH/17h** |
| --- | --- | --- | --- |
| **oxidation** | 39.2% | 20.9% | 17.1% |

Because of the fact that a complete oxidation of the bridging ethane groups alone would already cause a mass loss of 9.1%

-9.1%

(assuming: (CH3O)3Si-CH2-CH2-Si(OCH3)3 Si2O3(CH2-CH2)1SiO2)

even smaller amounts of block copolymer result for these materials:

|  | **as synthesized** | **extr. RT/EtOH/10h** | **extr. Soxhlet/EtOH/17h** |
| --- | --- | --- | --- |
| **oxidation** | 31.1% | 11.8% | 8.0% |
